# Supplementary material
Source: Springer Nature journal article supplement (https://www.springermedizin.de/resource/supplementary/12995_2010_127_MOESM2_ESM.pdf/9622792)

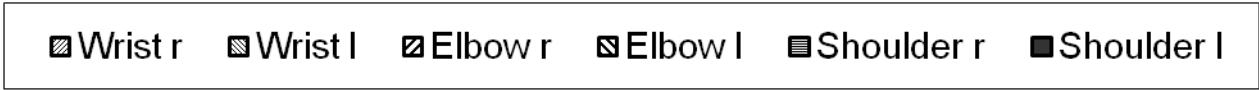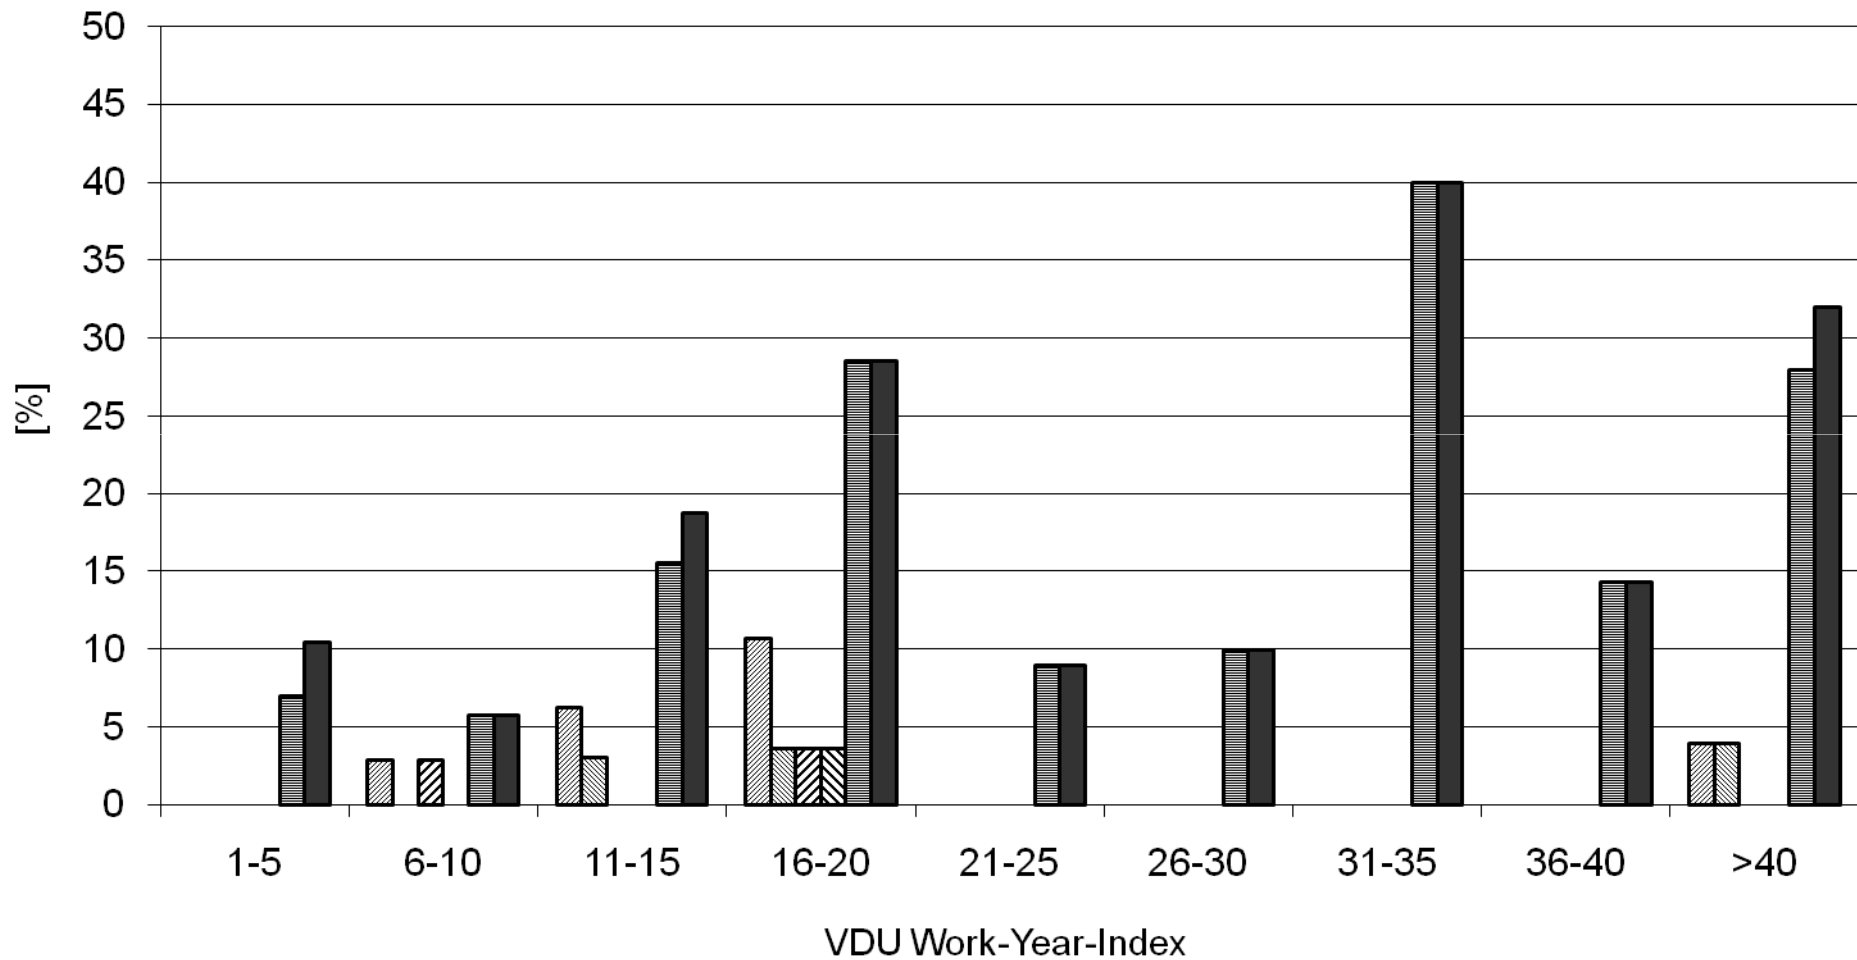

Supplement: MOESM2 [file 9622792]
